# **Metapopulation connectivity in Voles (*Microtus* sp.) as a gauge for tallgrass prairie restoration in midwestern North America**

Marlis R. Douglas<sup>1</sup>, Whitney J.B. Anthonysamy<sup>1,a</sup>, Mark A. Davis<sup>2</sup>, Matthew P. Mulligan<sup>3</sup>,  
Robert L. Schooley<sup>4</sup>, Wade Louis<sup>5</sup>, Michael E. Douglas<sup>1,\*</sup>

<sup>1</sup>Biological Sciences, University of Arkansas, Fayetteville 72701 USA

<sup>2</sup>Illinois Natural History Survey, University of Illinois, Champaign 61820 USA

<sup>3</sup>Lincoln Park Zoo, Chicago IL 60614 USA

<sup>4</sup>Natural Resources and Environmental Sciences, University of Illinois, Urbana IL 61801 USA

<sup>5</sup>Illinois Department of Natural Resources, Gibson City 60936 USA

<sup>a</sup>Current address: Basic Sciences, St. Louis College of Pharmacy, MO 63110 USA

\*[med1@uark.edu](mailto:med1@uark.edu)

**Short title:** Grasslands restoration and vole metapopulation connectivity

## 2 **Abstract**

Applying quantifiable metrics to validate the success of restoration efforts is crucial for ongoing  
4 management programs in anthropogenically fragmented habitats. Estimates of dispersal can  
provide such baseline data because they measure not only the extent to which restored patches  
6 are colonized and interconnected, but also their metapopulation source/sink dynamics. In this  
context, we estimated dispersal and population connectivity among prairie (*Microtus*  
8 *ochrogaster*; N=231) and meadow vole (*M. pennsylvanicus*; N=83), sampled from eight restored  
plots at five tallgrass prairie sites embedded within the agricultural matrix of midwestern North  
10 America. Our expectation was that extensive distances separating these restored habitats (i.e.,  
48–246 km) would spatially isolate vole metapopulations, resulting in significant genetic  
12 differentiation. We first used molecular taxonomy to validate the field-identifications of all  
sampled individuals, then used pairwise  $F_{ST}$  derived from 15 microsatellite DNA loci to estimate  
14 genetic connectivity among the species-delimited study populations. Metapopulation stability  
was gauged by assessing migration rates and deriving effective population sizes ( $N_e$ ). We also  
16 calculated relatedness values ( $r$ ) as a potential surrogate for contact in prairie vole, a primary  
vector for Lyme disease. Molecular species-assignments contravened field-identifications in 25%  
18 of samples (11 prairie/67 meadow) and identified two instances of species-hybridization (0.6%).  
Local effects (i.e., population crash/drought) were manifested at two sites, as documented by  
20 significant temporal declines in  $N_e$  and  $r$ . Overall, high migration rates and non-significant  
(10/15) pairwise  $F_{ST}$  values underscored elevated metapopulation connectivity. A single site that  
22 recorded five significant  $F_{ST}$  values also displayed significant  $r$ -values indicating the inadvertent  
sampling of closely related individuals. This highlights the close social groupings among

24 cooperatively-breeding prairie vole that can exacerbate Lyme disease transmission. Thus, while  
elevated population connectivity aligns with prairie restoration goals, it also reinforces a need in  
26 adaptive management to evaluate environmental matrices for their permeability to vector-borne  
diseases.

## 28 **Introduction**

‘Distribution’ and ‘abundance’ are not only recognized as natural history attributes of species,  
30 but also the building blocks of ecology [1]. Yet, their functional integrity is being seriously  
eroded by an anthropogenic fragmentation of habitat [2], with the rendering of species  
32 distributions into subdivided, often isolated populations as a result of large-scale modifications.  
Ancillary considerations, such as ‘dispersal’ and ‘population connectivity,’ have instead become  
34 paramount [3], in that they more appropriately mirror the effects of the Anthropocene [4]. These  
impacts are most apparent within temperate grassland biomes (>8% of the global landmass [5])  
36 reflecting the ease with which these biomes can be transitioned from their native state into  
anthropogenic settlements and agricultural plots.

38       The anthropogenic conversion of grasslands is most apparent in the Tall Grass Prairie of  
Midwestern North American [6], where greenhouse gas emissions exceed the national average  
40 by >20 [7]. Furthermore, the growing season and agricultural row-crop technology inherent to  
this region have now been significantly extended ([8], table 1), and the anthropogenic  
42 magnification both components has subsequently enhanced the already well-established  
agricultural capacity of the region [9]. In addition, an increasing market demand for biofuels has  
44 intensified the removal of perennially rooted vegetation, leading to the general elimination of  
potential 'edge' habitats along the margins of agricultural fields that served to sustain essential  
46 connectivity among habitat fragments [10]. Other consequences of large-scale habitat alterations  
are the loss of indigenous biodiversity and biotic homogenization [11].

48           The detrimental consequences of these anthropogenic impacts can be stemmed, or even  
reversed through habitat restoration. In the prairie landscape of North America, numerous  
50   conservation initiatives have been implemented so as to improve remnant grassland parcels and  
increase population numbers of targeted wildlife. This is manifested in Illinois through project  
52   SAFE (State Acres for Wildlife Enhancement; <http://www.dnr.state.il.us/orc/safe/>), a managerial  
approach actively promoted by the Illinois Department of Natural Resources (IDNR) as a means  
54   of rehabilitating agricultural land specifically within two targeted regions: Grand Prairie Natural  
Division (east-central IL), and Southern Till Plain (south-central IL).

56           However, one critical aspect of restoration is how 'success' is defined, and what metrics  
are potentially used to gauge its success. As a mechanism to quantify the effectiveness of  
58   restoration efforts, we gauged impacts of habitat rehabilitation on metapopulation connectivity of  
prairie vole (*Microtus ochrogaster*) and meadow vole (*M. pennsylvanicus*), as a means of  
60   evaluating the spatio-temporal genetic structure of this particular biodiversity component.  
Herein, metapopulations are defined as a collection of spatially separated subpopulations that  
62   experience some level of gene flow [12]. Additionally, voles are a model organism to evaluate  
the manner by which habitat quality can impact population dynamics and demographics [13].  
64   They are easily captured via live trapping, a technique that yields replicable population size  
estimates. Voles can also subsist in smaller home ranges (100m<sup>2</sup>) within relatively reduced  
66   habitats, yet still reflect population-scale processes. Grasses and sedges are preferred habitats,  
and this is beneficial from an experimental stance in that the habitat can be easily manipulated so  
68   as to produce patches of different quality and quantity, thus promoting hypothesis testing within  
a field setting [14]. Reduced ground cover, for example, tends to impede dispersal, reduce

70 residency, and promote mortality due to predation. In addition, landscapes artificially modified  
to accommodate a diversity of habitat-types also allow the imposition of experimental designs  
72 that are difficult to establish and/or maintain in a natural setting. Live trapping associated with  
fenced plots, for example, can separate dispersal from mortality, a consideration difficult to  
74 obtain under natural conditions. It also allows for iterative replication, again difficult to  
accomplish when study plots are open landscapes.

76 We evaluated vole metapopulations across five widely distributed SAFE sites deeply  
imbedded within an anthropogenic row-crop landscape as a mechanism to test if large  
78 topographical distances, coupled with the extent to which patches are separated within the highly  
modified agricultural matrix, would act synergistically to curtail vole dispersal [15]. Because  
80 prairie vole is a highly philopatric and socially monogamous rodent that often breeds  
cooperatively [16], it offered an opportunity to explore the manner by which social- and kin-  
82 structure in vole populations might impact dispersal.

We employed microsatellite DNA analyses to 1) quantify genetic diversity in both vole  
84 species within and among the SAFE sites, and 2) assess levels of temporal and spatial gene flow  
as a metric for landscape permeability. In this sense, population genetic patterns reflect dispersal  
86 of organisms through complex environments, and hence can reveal if connectivity indeed exists  
among patches widely separated within an anthropogenically-modified landscape [17]. This, in  
88 turn, provides an estimate for the permeability of the landscape, a relevant aspect in that diverse  
patches interspersed with edges and corridors are important components for conservation and  
90 management within agro-ecosystems [18]. We expected metapopulation structure to be defined

by limited connectivity among study sites, particularly given the life histories of our study  
92 species and the dominance of the agro-ecosystem within which our study plots were isolated.

## 94 **Materials and methods**

### **Sampling and DNA extraction**

96 Prairie and meadow vole were live trapped from mid-May through mid-August (2010–2012)  
across five Illinois SAFE sites (Fig 1). Sampling plots within each (i.e., 1.96–64.58ha) contained  
98 six transects of 15 traps set 7m apart, with trapping conducted over three consecutive evenings  
(N=90 traps/ plot/ night [19]). Ear tissue was sampled from each captured vole and stored for  
100 genetic analyses in 95% EtOH at -20°C. Whole genomic DNA was extracted using PROMEGA  
Wizard Kit (2010–2011) or QIAGEN DNeasy Blood and Tissue Kit (2012) and quantified using  
102 an Implen Pearl P-300 nanophotometer.

### 104 **Fig 1. Map depicting rehabilitation locations for Illinois State Acres for Wildlife**

**Enhancement** (SAFE: <http://www.dnr.state.il.us/orc/safe/>). Blue indicates SAFE sites located in  
106 the Grand Prairie, and red sites in the Southern Till Plain. SAFE sites sampled for prairie vole  
(*Microtus ochrogaster*) and meadow vole (*M. pennsylvanicus*) during 2010–2012 are depicted in  
108 green. Yellow indicates study location documenting infestation of *M. ochrogaster* by black-  
legged or deer tick (*Ixodes scapularis*) and its Lyme disease bacterium, *Borrelia burgdorferi*  
110 (Bb).

## 112 **Microsatellite DNA Genotyping**

Microsatellite loci previously developed for vole species were evaluated for consistent cross-  
114 amplification in prairie and meadow vole, with as set of 23 loci selected and combined into six  
multiplex panels using fluorescently labeled forward primers (Supplemental Appendix I).  
116 Amplifications were conducted in 10–15 $\mu$ l volume polymerase chain reactions (PCR) using  
approximately 10–15ng template and following standard procedures.

118 **Fragment Analysis.** Microsatellite DNA fragments were resolved on an automated  
Applied Biosystems (ABI) Prism 3730xl GENEANALYZER (W. M. Keck Center, University of  
120 Illinois, Champaign). An internal size standard (Liz 500) was run with each sample, and alleles  
were scored using GENEMAPPER© 4.1 software (ABI). Genotypes were partitioned by species,  
122 site, and sampling period, then tested via MICRO-CHECKER 2.2.3 [20] for possible null alleles,  
large allele dropout, and scoring errors. All pairs of loci were tested for linkage disequilibrium  
124 (Markov Chain parameters: 10,000 dememorization steps, 500 batches, 5,000 iterations), and  
each locus evaluated for deviations from Hardy-Weinberg equilibrium (HWE) using exact tests  
126 (GENEPOP 4.0; [21]) with Bonferroni correction for multiple comparisons [22].

## 128 **Assignment of individuals to species**

Prairie and meadow vole are morphologically similar, and accurate identification can be difficult  
130 particularly when non-lethal sampling is conducted. To verify field-based morphological species  
identification, we first used the population assignment option in GENALEX 6.50 [23] with  
132 samples clustered according to similarities in genotype. Genetic-based species assignments were  
used to re-classify individuals to species that were then re-evaluated for distinct gene pools using



134 a Bayesian assignment test (STRUCTURE 2.3.4 [24]), with admixture ancestry and correlated  
allele frequency options employed [25].

136 **Molecular taxonomy.** To further verify species designation, a diagnostic locus  
(*Microtus avprla* gene [26]) was evaluated that displays considerable size differences between  
138 the two species, with prairie vole at ~600–800bp and meadow vole at ~200–300bp. A subset of  
samples (n=68) was tested for concordance between field- and genetic-based species  
140 identification, using primers and PCR protocols adapted from previous studies [27,28,29].  
Species identification was confirmed by separating PCR products on 2.5% agarose gel, staining  
142 with GELGREEN (Biotium Inc., Hayward, CA), and visualization on a bluelight transilluminator.

## 144 **Genetic diversity and structure of vole metapopulations**

Standard population genetic parameters were calculated as quantitative metrics for diversity  
146 within and among sites. Allelic frequencies, observed ( $H_O$ ), and expected heterozygosities ( $H_E$ )  
were estimated for each species at each site using GENALEX. Values for allelic richness ( $A_R$ ) and  
148 private allelic richness ( $P_{AR}$ ) were derived from rarefaction and corrected for sample sizes (HP-  
RARE v. June-6-2006 [30]). In addition, pairwise relatedness ( $r$ ) was evaluated among individuals  
150 using the Ritland-1996 estimator in GENALEX, so as to reduce potential bias in genetic estimates  
caused by inadvertent sampling of related individuals in localized trapping transects.

152 **Bayesian clustering.** To further assess distribution of gene pools among and within  
sampling locations, we conducted assignment tests using STRUCTURE. Ten replicates were run  
154 for  $K$ -values ranging from one to the number of sampling locations or years, using a burn-in of  
500,000 iterations followed by 1,000,000 Markov Chain Monte Carlo (MCMC) replicates. The

156 optimal number of clusters for each simulation (per STRUCTURE HARVESTER 0.6.1 [31]) then  
allowed a calculation of the *ad hoc* statistic ‘ $\Delta K$ ’ [32]. To test for isolation by distance (IBD), a  
158 Mantel test was conducted in GENALEX using 999 permutations. Genetic divergence was gauged  
as  $F_{ST}/(1 - F_{ST})$ , and geographic distances (log-transformed) were evaluated as the shortest  
160 distance between sites (ARCMAP 10.1; ESRI 2012, Redlands, CA, USA).

**Pairwise  $F_{ST}$ .** We employed  $F_{ST}$ -values as a standardized index to gauge population  
162 connectivity and as indicators of gene flow, with values varying from 0 (identical allele  
frequencies indicating panmixia) to 1 (populations fixed for different alleles indicating isolation)  
164 [12]. Spatial and temporal patterns of gene flow were estimated by plot (transect) among sites  
within years, and within sites among years (GENALEX, with 9,999 permutations and missing data  
166 interpolated). Gene flow could only be reliably assessed for prairie vole, due to variability in  
numbers of samples obtained at sites among years, as well as the uneven distribution of samples  
168 following genetic re-classification to species.

Pairwise  $F_{ST}$  values for prairie vole were derived among three SAFE sites (i.e.,  
170 Livingston, Pontiac, and Prairie Ridge) in 2010, and two sites in 2012 (i.e., Montgomery and  
Prairie Ridge). Pairwise  $F_{ST}$  was similarly derived among years across two sites subjected to  
172 environmental perturbations (Montgomery: 2011 *versus* 2012/ Prairie Ridge: 2010 *versus* 2012).

## 174 **Estimates of migration and effective population size**

Individual movements heavily influence metapopulation dynamics, and two are of particular  
176 importance in this regard: Colonization (i.e., movement into a novel habitat patch) and migration  
(i.e., the immigration into occupied patches). For example, the annual replanting of crops is an

178 agro-ecosystem dynamic that annually converts vole subpopulations into sinks that must be  
potentially re-colonized from a source [33].

180 **Recent migration among SAFE sites.** Potential F1 descendants of migrant  
individuals were identified using GENECLASS2 2.0 [34]. We selected the 'L\_home' test statistic  
182 (i.e., the likelihood of obtaining the genotype of an individual from the sampled population),  
under the assumption that not all source populations were sampled. A Monte Carlo resampling  
184 method was selected, with 10,000 bootstraps and a threshold value of 0.05, as it offers improved  
performance when identifying first generation migrants while also controlling for Type-I error  
186 rates [35].

**Effective population size.** Trapping success was uneven among years, impacted by  
188 an apparent population crash in 2011 and a substantial drought in 2012 [19]. To gauge the effects  
of these perturbations on vole metapopulations, we quantified effective population size ( $N_e$ ) [36]  
190 based upon estimates of linkage disequilibrium (i.e., a non-random association of independent  
alleles with haplotypes occurring in unexpected frequencies [37]). The  $N_e$  metric reflects the rate  
192 of random genetic drift (i.e., random fluctuations in allele frequencies over time [12]), as well as  
the effectiveness of selection and migration. It also indicates the loss of heterozygosity in the  
194 population, and links strongly with demographic factors such as sex ratio, population size, and  
lifetime fitness.

196 Due to sample size limitations,  $N_e$  could only be derived for prairie vole at Prairie Ridge  
(2010 *versus* 2012) and Montgomery (2011 *versus* 2012). Mean  $N_e$  was compared by year at  
198 these two SAFE sites by implementing Welch's t-test for unequal variances. This approach is  
more robust than Student's t-test and maintains Type-I error rates despite inequalities among

200 variances and sample sizes. The test was performed in R [38] using summary statistics and a  
suitably modified web-based program ([http://stats.stackexchange.com/questions/30394/how-to-](http://stats.stackexchange.com/questions/30394/how-to-perform-two-sample-t-tests-in-r-by-inputting-sample-statistics-rather-than)  
202 [perform-two-sample-t-tests-in-r-by-inputting-sample-statistics-rather-tha](http://stats.stackexchange.com/questions/30394/how-to-perform-two-sample-t-tests-in-r-by-inputting-sample-statistics-rather-than)).

## 204 **Results**

### **Sampling, genotyping, and species assignments**

206 Over the three field seasons, we acquired a total of 360 samples across five sites (Table 1). Of  
these, 194 were field-identified as prairie vole, and 166 as meadow vole, yielding a prairie-to-  
208 meadow-vole ratio of 1.17/ 1.0. All samples were genotyped across 23 microsatellite loci, with  
eight loci subsequently removed, due either to null alleles or scoring problems, with 15 loci  
210 remaining for data analyses. In addition, 46 samples were excluded due to the presence of  
missing data, leaving N = 314 for detailed evaluations. Linkage disequilibrium was detected but  
212 was inconsistent across temporal periods or sites, and thus attributed to demographic effects on  
genetic structure rather than non-independence amongst loci.

214

**Table 1. Total number of vole samples collected during three field seasons (2010–2012)**

216 **across five Illinois SAFE sites.** Samples were harvested non-invasively from two species  
[prairie vole (*Microtus ochrogaster*) and meadow vole (*M. pennsylvanicus*)], but only totals are  
218 listed. Figure 1 shows geographic location of sites.

| <b>Site</b> | <b>2010</b> | <b>2011</b> | <b>2012</b> | <b>Totals</b> |
|-------------|-------------|-------------|-------------|---------------|
| Livingston  | 27          | 4           | 10          | 41            |
| Montgomery  | 0           | 56          | 41          | 97            |

|               |     |    |     |     |
|---------------|-----|----|-----|-----|
| Pontiac       | 21  | 1  | 9   | 31  |
| Prairie Ridge | 60  | 3  | 32  | 95  |
| Saybrook      | 0   | 19 | 77  | 96  |
| Total         | 108 | 83 | 169 | 360 |

220

Genotype-based species assignment was concordant with 75% of field identifications based on morphology (236 of 314). Among the remaining 78 field identifications, 11 prairie and 67 meadow voles were genetically reclassified (Fig 2, top), resulting in a 231 prairie and 83 meadow voles, respectively. A subsequent Bayesian assignment test based on genetic species identification consistently allocated all 314 samples (Fig 2, bottom). Screening with the diagnostic *avpr1a* locus confirmed species-level classification for 97% of test samples (65/67), with two individuals (0.6% of 314) identified as admixed (Bayesian assignment plot; Fig 2, bottom), suggesting in turn a rare occurrence of hybridization between species. Genetic species assignments rather than field identification were employed in subsequent analyses.

230

**Fig. 2. Top: Samples of prairie vole (*Microtus ochrogaster*) and meadow vole (*M. pennsylvanicus*) allocation to species.** Samples (N=314) were collected at five Illinois SAFE sites from 2010–2012. Initial species identification in the field was based on morphology. Genotypes, derived across 15 microsatellite loci, were then used to allocated samples to two gene pools using a population assignment test in GENALEX v. 6.5. Bottom: Allocation of genotypes derived from 15 microsatellite loci using a population assignment test in STRUCTURE v2.3.4. Species identification was based on molecular genetic reclassification. Shading reflect distinct gene pools and vertical bars represent probabilities of assigning an individual to a gene pool.

## 240 Genetic diversity and metapopulation structure

242 Microsatellite DNA polymorphism was high in both species, with an average of 22.7 and 16.3 alleles per locus, with observed heterozygosity ( $H_O$  for prairie and meadow vole) = 0.80 and 0.70, respectively (Table 2). Pairwise  $F_{ST}$  values were non-significant for prairie vole by plot and 244 site, at both spatial and temporal scales, save for comparisons with Prairie Ridge (Table 3). These significant  $F_{ST}$  values were not associated with geographic distance, and a test for IBD was 246 non-significant ( $p=0.36$ ).

248 **Table 2. Diversity statistics based on 15 microsatellite loci for 212 prairie vole (*Microtus ochrogaster*) and 75 meadow vole (*M. pennsylvanicus*) collected from five Illinois SAFE sites.** Listed are: N = number of individuals genotyped per locus;  $N_a$  = average number of alleles per locus;  $N_a$  SE = Standard error for average number of alleles per locus;  $A_R$  = allelic richness 250 corrected for sample size;  $A_R$  SE = Standard error for allelic richness corrected for sample size;  $P_{AR}$  = private allelic richness corrected for sample size;  $P_{AR}$  SE = Standard error for private 252 allelic richness corrected for sample size;  $H_O$  = observed heterozygosity;  $H_O$  SE = Standard Error for observed heterozygosity. 254

|              | Site          | N  | $N_a$ | $N_a$ SE | $A_R$ | $A_R$ SE | $P_{AR}$ | $P_{AR}$ SE | $H_o$ | $H_o$ SE |
|--------------|---------------|----|-------|----------|-------|----------|----------|-------------|-------|----------|
| Prairie Vole | Livingston    | 28 | 13.5  | 1.4      | 12.4  | 1.2      | 1.4      | 0.3         | 0.81  | 0.04     |
|              | Montgomery    | 71 | 17.7  | 1.8      | 12.7  | 1.1      | 1.6      | 0.3         | 0.79  | 0.04     |
|              | Pontiac       | 23 | 13.2  | 1.1      | 13.0  | 1.1      | 1.4      | 0.3         | 0.83  | 0.04     |
|              | Prairie Ridge | 85 | 16.2  | 1.7      | 12.1  | 1.1      | 1.0      | 0.3         | 0.80  | 0.05     |
|              | Saybrook      | 5  | 6.3   | 0.5      | -     | -        | -        | -           | 0.84  | 0.06     |
|              | Livingston    | 6  | 6.3   | 0.5      | -     | -        | -        | -           | 0.63  | 0.07     |

256

| Meadow |          |    |      |     |   |   |   |   |   |      |      |
|--------|----------|----|------|-----|---|---|---|---|---|------|------|
| Vole   | Saybrook | 69 | 15.7 | 1.3 | - | - | - | - | - | 0.70 | 0.06 |

258 **Table 3. Pairwise  $F_{ST}$  estimates derived from 15 microsatellite DNA loci for prairie vole**

(*Microtus ochrogaster*) collected by year from plots (=Plot) in Illinois SAFE sites (=Site).  $F_{ST}$

260 values are below diagonal and P-values above diagonal. Bonferroni-adjusted statistical significance for 2010 (upper panel) =  $p < 0.003$ , and  $P < 0.008$  for 2012 (lower panel). Sample sizes for plots are in

262 Table 5. Significant values are in bold.

264

| 2010 - Site   | Plot      | L-H   | L-M   | P-C   | P-T   | PR-H  | PR-T         |
|---------------|-----------|-------|-------|-------|-------|-------|--------------|
| Livingston    | Hummel    | X     | 0.893 | 0.024 | 0.475 | 0.079 | <b>0.002</b> |
| Livingston    | Marge     | 0.020 | X     | 0.601 | 0.783 | 0.580 | <b>0.001</b> |
| Pontiac       | Curve     | 0.031 | 0.028 | X     | 0.923 | 0.156 | <b>0.001</b> |
| Pontiac       | Tower     | 0.037 | 0.036 | 0.036 | X     | 0.534 | 0.090        |
| Prairie Ridge | Harvey    | 0.017 | 0.017 | 0.022 | 0.029 | X     | <b>0.001</b> |
| Prairie Ridge | Tombstone | 0.025 | 0.029 | 0.033 | 0.038 | 0.018 | X            |

| 2012 - Site   | Plot      | M-H   | M-L   | PR-H         | PR-T         |
|---------------|-----------|-------|-------|--------------|--------------|
| Montgomery    | Huber     | X     | 0.023 | <b>0.006</b> | 0.012        |
| Montgomery    | Lane      | 0.025 | X     | 0.011        | <b>0.001</b> |
| Prairie Ridge | Harvey    | 0.055 | 0.044 | X            | 0.013        |
| Prairie Ridge | Tombstone | 0.027 | 0.023 | 0.043        | X            |

266 Assignment tests revealed three distinct gene pools (Fig 3) that were primarily distributed across sites, with spatial substructure evident within but one site (i.e., Prairie Ridge; Fig 3A and Fig 3B). Interestingly, substructure at this site was retained from 2010 to 2012 (Fig 3C), but ancestry proportions shifted significantly between years following the 2011 population crash ( $F_{ST}$  = 0.014;  $P < 0.0001$ ), a pattern consistent with either drift or re-colonization. In contrast, the

270

second site (i.e., Montgomery; Fig 3D) showed almost identical ancestry proportions in gene  
272 pools for 2011 and 2012.

274 **Fig 3. Spatial patterning of gene pools within Prairie Vole (*Microtus ochrogaster*)** among  
Illinois SAFE sites in A) 2010 and B) 2012, and among years within Illinois SAFE sites C)  
276 Prairie Ridge and D) Montgomery. Plots are based on genotypes derived across 15 microsatellite  
and based on Bayesian Assignment tests (STRUCTURE v2.3.4). Colors reflect distinct gene pools  
278 and vertical bars representing individuals and proportion of colors reflecting probabilities of  
ancestry in a gene pool. Sample sizes are in Table 5.

280

### **Estimates of migration and effective population size**

282 Estimates of migration calculated in GENECLASS2 indicated contemporary movements of  
individuals among SAFE sites (Table 4). In prairie vole, five (2%) individuals had a probability  
284 threshold below 0.01 and were identified as potential migrants based on assignment of one  
sample from Livingston to Pontiac, two from Montgomery to Livingston, one from Pontiac to  
286 Livingston, and one individual from Prairie Ridge to Pontiac. No potential migrants were  
identified for meadow vole, but this species was only captured at two sites, with six individuals  
288 sampled from Livingston and the remainder from Saybrook.

290 **Table 4. Estimated rates of migration versus residency calculated for prairie vole (*Microtus***  
***ochrogaster*)** within and between three Illinois SAFE sites (Livingston, Montgomery, and  
292 Prairie Ridge). Vole samples were collected over two years: 2010 [Livingston (N=24); Prairie



Ridge (N=57)] and 2012 [Montgomery (N=35); Prairie Ridge (N=30)]. Values are posterior  
294 estimates for mean and 95% highest posterior density interval (in parentheses). Bold values =  
residency estimates.

| <b>2010</b>   | <b>Livingston</b>    | <b>Prairie Ridge</b> |
|---------------|----------------------|----------------------|
| Livingston    | <b>0.767 (0.418)</b> | 0.291 (0.066)        |
| Prairie Ridge | 0.233 (0.216)        | <b>0.709 (0.485)</b> |

  

| <b>2012</b>   | <b>Montgomery</b>   | <b>Prairie Ridge</b> |
|---------------|---------------------|----------------------|
| Montgomery    | <b>0.858 (0.51)</b> | 0.265 (0.003)        |
| Prairie Ridge | 0.142 (0.0003)      | <b>0.735 (0.341)</b> |

296

298 **Population crashes.** In 2011, effective population size ( $N_e$ ) in prairie vole declined  
significantly from 119 at Prairie Ridge in 2010 (95% CI = 84-195) to 36 in 2012 (95% CI = 28-  
300 50) ( $t = 4.58$ ;  $P < 0.00002$ ). Prairie vole displayed significantly lower  $N_e$  estimates during the  
2012 drought as well, with Montgomery declining from 1,314 (95% CI = 180- $\infty$ ) in 2011 to 119  
302 (95% CI = 80-221) in 2012 ( $t = 3.06$ ;  $P < 0.0032$ ).

## Relatedness

304 Average relatedness ( $r$ ) within plots ranged from 0.009–0.106, but values were generally higher  
among individuals at Prairie Ridge than at other sites (Table 5). Relatedness at the Harvey plot  
306 differed significantly from 2010 to 2012 ( $t = -3.06$ ,  $P < 0.028$ ), whereas those for the Tombstone  
plot did not ( $t = -0.54$ ,  $P > 0.6$ ). Across plots and sites, the average pairwise relatedness and  
308 geographic distance were significantly but inversely related in 2010, with relatedness

diminishing as distances increased (3 sites, 6 plots;  $P=0.027$ ). However, relatedness *versus*  
310 distance was non-significant in 2012 (2 sites, 4 plots;  $P=0.13$ ).

312 **Table 5. Yearly estimates of average relatedness (r) and variance derived from 15**  
**microsatellite DNA loci** from samples (=N) of prairie vole (*Microtus ochrogaster*) collected by  
314 plot (=Plot) in Illinois SAFE sites (= Livingston, Pontiac, Montgomery, and Prairie Ridge)

| <b>2010</b>   | <b>Plot</b> | <b>N</b> | <b>r</b> | <b>Variance</b> |
|---------------|-------------|----------|----------|-----------------|
| Livingston    | Hummel      | 13       | 0.037    | 0.004           |
| Livingston    | Marge       | 11       | 0.027    | 0.002           |
| Pontiac       | Curve       | 9        | 0.025    | 0.001           |
| Pontiac       | Tower       | 5        | 0.009    | 0.000           |
| Prairie Ridge | Harvey      | 28       | 0.031    | 0.004           |
| Prairie Ridge | Tombstone   | 26       | 0.050    | 0.007           |
| <b>2011</b>   |             |          |          |                 |
| Montgomery    | Huber       | 34       | 0.027    | 0.006           |
| Montgomery    | Lane        | 8        | 0.058    | 0.015           |
| <b>2012</b>   |             |          |          |                 |
| Montgomery    | Huber       | 11       | 0.026    | 0.005           |
| Montgomery    | Lane        | 24       | 0.039    | 0.013           |
| Prairie Ridge | Harvey      | 6        | 0.106    | 0.060           |
| Prairie Ridge | Tombstone   | 24       | 0.052    | 0.017           |

316

## Discussion

318 An essential consideration in the management of anthropogenically fragmented habitats is to  
gauge the success of ongoing restoration efforts. Metrics are needed to quantify the extent to  
320 which restored patches are colonized and interconnected. The metapopulation dynamics of small  
mammals are often used to gauge habitat fragmentation [39], and conversely, the potential

322 benefits accrued from anthropogenic land conversion [40]. However, large, homogenized  
agricultural landscapes are less well studied in this regard, due largely to a lack of community  
324 diversity when compared to natural habitats [41]. In addition, those studies that previously  
evaluated genetic structuring and diversity in agro-ecosystems reported conflicting results. For  
326 example, values can often exceed those found in more uniform natural areas, particularly given  
the aforementioned variability induced by agricultural management [42]. Conversely, population  
328 dynamics of voles can supersede the annual perturbations found in an agricultural landscape,  
such that isolation-by-distance (IBD) becomes the only delimiter for gene flow [43].

330 Our empirical evaluation of vole population genetic structure provides additional insights  
into these issues, and particularly those mechanisms by which restored patches of an agro-  
332 ecosystem are interconnected. Our results have important management considerations that  
impinge directly upon the achievement of habitat restoration goals. They may also have  
334 subsidiary ecological implications, particularly with regard to the permeability of an  
environmental matrix to vector-borne diseases [44].

336

## **Taxonomic uncertainty and species abundances**

338 The correct identification of species in the field is a fundamental assumption when ecological  
hypotheses are tested, and when conservation and management initiatives are implemented.  
340 Thus, by ignoring species uncertainty particularly among *Microtus* spp., biased estimates  
regarding population processes can emerge [45]. Meadow and prairie vole can be difficult to  
342 distinguish in the field, and their differentiation is based on qualitative characters that relate to  
pelage, as well as differences in tooth morphology [46].

344 Fortunately, species-diagnostic DNA markers can clearly discriminate among sympatric  
species [47], as well as decipher potential hybridization and introgression. For example, we  
346 found a 25% mismatch between field-identifications and those derived genetically for prairie and  
meadow vole, and similar disparities have also been observed in other studies [26]. We also  
348 documented two samples at one site (i.e., Saybrook) that represented hybridized or introgressed  
individuals. Meadow vole experienced a significant range expansion from northern into central  
350 Illinois during the 1970's, facilitated by the construction of interstate highways and  
accompanying right-of-ways. The impacts on Illinois wildlife have varied [48]. In this instance,  
352 it created a local contact zone between the two vole species that impacted their distributions [49].  
These aspects underscore the practicality of molecular species identification, particularly in our  
354 example with regard to conflicting identification among sympatric voles.

Prairie and meadow vole respond differently to the composition of the environment,  
356 particularly as it relates to trophic and habitat preferences [50,51]. Prairie vole is more tolerant of  
sparse cover, for example, whereas meadow vole prefers more dense vegetation. Habitat  
358 preference may explain the disparity in our samples with regard to their presence and/ or  
abundance, particularly given that vegetation communities varied among study sites [19].  
360 Because voles are important grassland components [52] with responses that differ with regard to  
vegetation management, their accurate identification is clearly an important consideration when  
362 evaluating the success of prairie restoration. Our study demonstrates the effectiveness of genetic  
data in accurately diagnosing species.

364

## **Dispersal capacity in agricultural landscapes**

366 Small mammal communities are substantial components of grassland biodiversity and are  
intimately linked with complex trophic interactions in grassland ecosystems [52]. Deer mice  
368 (*Peromyscus* sp.) and vole (*Microtus* sp.) are ubiquitous in these systems and their  
metapopulation dynamics are strongly influenced by crop type, farming practices, and  
370 vegetational structure [51].

Most habitats are characterized by spatial heterogeneity with regard to patch quality and  
372 this variability modulates demographic processes, such as population density and dispersal rates.  
Experimental manipulations of patch quality (with regard to amount of food and predation risk)  
374 demonstrate that patch quality affects dispersal in prairie vole [53], as well as their intrinsic  
population demographics (e.g., growth rates and reproductive success; [54], but not social  
376 structure [55]).

The impacts of habitat fragmentation on movements of small mammals were examined in  
378 a 7-year mark-recapture study conducted over three types of 0.5ha blocks: Single large patches  
(5,000m<sup>2</sup>); clusters of medium patches (288m<sup>2</sup>); and clusters of small patches (32m<sup>2</sup>) [14].  
380 Prairie vole moved further as fragmentation increased, but did so in decreasing proportions, with  
male dispersal rates exceeding those of females. Also, a greater number (primarily juvenile  
382 males) switched from smaller blocks in the study design to larger blocks. The researchers  
concluded that, at the small scale of 5,000m<sup>2</sup>, most species in fragmented habitats moved farther  
384 when they did move (presumably for trophic and reproductive purposes), but did not move often,  
potentially due to costs associated with distances traveled.

386 We predicted the highly fragmented and agriculturally dominated landscape of central  
Illinois would impede vole dispersal, particularly given that SAFE sites were separated by 48–

388 246km from one another. Yet, prairie vole displayed a greater than expected capacity for  
dispersal, as evidenced by both temporal and spatial population structure, suggesting in turn that  
390 gene flow is clearly, and surprisingly, maintained across study sites. ‘Border habitats’ such as  
fencerows, roadside ditches, and waterways can promote re-colonization of restored grasslands  
392 [56], and in this regard, may be especially important in maintaining vole connectivity,  
particularly given their rapid demographic responses that often follows population crashes [57].  
394 In this sense, restored grasslands can serve as a ‘source’ in the context of vole metapopulation  
dynamics, and thus buffer those subsequent population declines that are induced by the annual  
396 harvesting/ replanting of crops [19].

## 398 **Genetic structure in voles**

Gene flow in prairie vole is also modulated spatially and temporally, as observed in other studies  
400 that examined spatial and scale-dependent variability in gene flow [33].  $F_{ST}$  and STRUCTURE  
analyses showed weak divergence among sites, and admixture within sites was greater for  
402 consecutive (i.e., 2011 vs. 2012) than non-consecutive years (i.e., 2010 vs. 2012).

Geographic distance can be a primary factor in determining the dispersal of rodents in  
404 converted ecosystems [58]. However, the relationship between geographic distance and patterns  
of genetic structure was non-significant in our study. Although SAFE sites demonstrated high  
406 connectivity, as evidenced by a lack of strong population structure and the potential for migrant  
individuals among sites, the subtle structure detected by  $F_{ST}$  analyses could indicate a  
408 relationship between large population size and long-distance dispersal as imposed by the agro-  
ecosystem matrix [43]. Further, temporal shifts in genetic structure have been linked to

410 population turnover and to fluctuations in population densities among years [56]. Prairie and  
meadow vole each display multi-annual population density cycles that are non-synchronous  
412 between species [50,57].

Vole captures in this study were not arrayed equally across years. Instead, a majority  
414 (47%) were collected in 2012, with 23% in 2011, and 30% in 2010. Population fluctuations were  
manifested across sites as well, with the smallest samples occurring for three sites in 2011,  
416 whereas two sites contained the fewest individuals in 2010 (Table 1). Lower densities will alter  
spatial structure at the metapopulation scale, it will be enhanced during periods of high densities  
418 [33], thus influencing dispersal tendencies and subsequently genetic structure.

**Localized genetic structure.** On a more local scale, genetic structure in voles can  
420 be attributed to the spatial clustering of kin [16] or reflect gender-specific differences in space  
use [56]. Prairie vole is monogamous, with strong pair bonds, and displays an elevated degree of  
422 philopatry and sociality [59]. Preferences for familiar peers are maintained in part by aggression  
toward unfamiliar individuals, as in mate partnerships [60]. Conversely, meadow vole is  
424 promiscuous and with males more likely to disperse [53]. Here, social tolerance is an important  
feature, as demonstrated by reduced aggression toward unfamiliar conspecifics [60].

426 At Prairie Ridge, clear genetic substructure was detected between two sampling plots  
separated by ~5km, and with restoration histories (intermediate *versus* established) that differed  
428 with regard to years since seeding [19]. The established plot (i.e., seeded >10 years ago)  
exhibited consistently elevated average relatedness when compared to the intermediate plot  
430 (seeded 3 years ago). This underscores that restoration age, as well as connectivity, may  
influence genetic structure. In fact, temporal stability of genetic composition in the root vole

432 (*Microtus oeconomus*) was attributed in part to immigration of closely related individuals from  
nearby areas [54]. Thus, despite social structure (i.e., kin groups), gene flow may not  
434 significantly impact genetic composition of study population, despite large population  
fluctuations.

436

### **Beyond restoration: Small mammals as disease vectors**

438 Dispersal and population connectivity are aspects that also translate to a variety of ecological  
processes [61]. For example, they can help evaluate the porosity of the fragmented habitat to  
440 emerging infectious diseases (EIDs), and thus are key elements that can gauge availability of,  
and contact rates among, individuals of a host species [62].

442 Landscape genetic tools are often employed to characterize population dynamics, gene  
flow and movement pathways of disease hosts across heterogeneous landscapes [63], as well as  
444 to ascertain the concurrent spread and persistence of infectious agents associated with these  
movements [64]. For example, gene flow estimates in white-tailed deer (*Odocoileus virginianus*)  
446 corresponded to the rapid expansion of chronic wasting disease (CWD) in northern Illinois/  
southern Wisconsin and served to identify those habitats with an elevated risk for infection [65].

448 In this regard, grassland rodents are recognized as important vectors and host reservoirs  
for EIDs, as evidenced by the contemporary spread of Hanta virus [66], as well as Lyme disease.  
450 Of interest in our study is the fact that Lyme disease does not impact the survival of the rodent  
[67], but merely utilizes them as a vector for the dissemination of the disease host (i.e., ticks).  
452 Importantly, Lyme disease is an EID of increasing concern due to its rapid geographic expansion  
promoted by climate change and has become a substantial threat to human health in midwestern



454 North America [68]. It is one of the most common vector-borne illnesses in the United States  
(<http://www.cdc.gov/lyme/stats/>), with >30,000 cases reported annually. The expansion of Lyme  
456 disease is concomitant with the spread of the tick host (*I. scapularis*), as promoted by ongoing  
climate change [68]. Of importance is the capacity of *I. scapularis* to parasitizes multiple vectors  
458 that demonstrate both short- and long-distance dispersal [69]. Optimal habitat for the tick is  
prairie and young forest, and the prevalence of the causative agent for Lyme disease, *Borrelia*  
460 *burgdorferi* (*Bb*: the bacterium causing Lyme Disease), is 2x-greater in prairie habitat, with  
prairie vole the exclusive vector in those habitats [70].

462         Although we did not quantify the rate of *Bb* infection in our study individuals, it was  
previously demonstrated to be quite prevalent among prairie vole in our study area ([70]; see Fig.  
464 1). In addition, the probability of transmission across restored grassland is quite high [71, 72], as  
suggested by the elevated genetic connectivity we found for prairie vole within plots (average  
466 width 3–7.5 km), and also among sites (at 48–246 km). This capacity for transmission, in turn,  
represents a largely unrecognized side effect that can develop in lockstep with the rehabilitation  
468 of agricultural lands. As such, it can represent an argument against a more positive interpretation  
of habitat restoration, with control measures for Lyme disease a primary concern [73]. Instead,  
470 our results, in tandem with non-significant  $F_{ST}$  values, stand in contrast to the suggestion that  
well-separated habitat patches will potentially limit the spread of an EID.

472

## Conclusions

474 The restoration of agricultural plots to tall grass prairie is an ongoing process implemented in  
midwestern North America by federal and state resource agencies, but with success often being

476 difficult to gauge. As a benchmark for successful management, we employed molecular ecology  
as a means to gauge restoration success by assaying for connectivity among vole populations  
478 found in rehabilitated Illinois prairie habitats. Successful habitat restoration may also elicit a  
potential downside in that it can increase the permeability of an environmental matrix (in this  
480 case, restored tallgrass prairie) to infiltration by vector-borne diseases.

## 482 **Author Contributions**

MRD, RLS, MPM, and MED conceived and designed the experiments. WJBA, MAD, and MPM  
484 collected data. WJBA and MAD analyzed the data. WJBA, MAD, MRD, and MED wrote the  
manuscript.

486

## **Acknowledgments**

488 We thank P. Wolff, S. Beyer, W. Hill, S. McLaughlin, K. Barmann, C. Griffith, B. Neece, A.  
Ahlers, J. Andrews, G. Spyreas, and J. Larkin for fieldwork. Illinois Department of Natural  
490 Resources (IDNR) facilitated landowner access to SAFE sites. The U.S. Fish and Wildlife  
Service (USFWS) Federal Aid in Wildlife Restoration Program, as administered by the Illinois  
492 Department of Natural Resources (IDNR), provided funding for this project. Additional funding  
was provided by endowments through University of Arkansas/ Fayetteville to MRD (Bruker  
494 Professor of Life Sciences) and MED (21<sup>st</sup> Century Chair in Global Change Biology). Opinions  
expressed herein represent those of the authors and do not reflect those of the Illinois Department  
496 of Natural Resources or the Illinois state government.

## 498 **Data accessibility**

Microsatellite data are available on the Dryad Digital Repository (<http://dx.doi.org/upon->  
500 acceptance).

502

## 504 **Author Contributions**

506 **Conceptualization:** Marlis R. Douglas, Robert L. Schooley, Michael E. Douglas.

**Data curation:** Marlis R. Douglas, Whitney J. B. Anthonysamy, Mark A. Davis.

508 **Formal analysis:** Marlis R. Douglas, Whitney J. B. Anthonysamy, Mark A. Davis, Michael E. Douglas.

510 **Funding acquisition:** Marlis R. Douglas, Robert L. Schooley, Wade Louis, Michael E. Douglas.

**Investigation:** Marlis R. Douglas, Whitney J. B. Anthonysamy, Robert L. Schooley, Mark A.

512 Davis, Robert L. Schooley, Wade Louis, Michael E. Douglas.

**Methodology:** Marlis R. Douglas, Whitney J. B. Anthonysamy, Mark A. Davis, Robert L.

514 Schooley, Matthew P. Mulligan, Michael E. Douglas.

**Project administration:** Marlis R. Douglas, Robert L. Schooley, Wade Louis, Michael E.

516 Douglas.

**Resources:** Whitney J. B. Anthonysamy, Mark A. Davis, Matthew P. Mulligan.

518 **Software:** Whitney J. B. Anthonysamy, Michael E. Douglas.

**Supervision:** Marlis R. Douglas, Robert L. Schooley, Wade Louis, Michael E. Douglas.

520 **Validation:** Marlis R. Douglas, Whitney J. B. Anthonysamy, Mark A. Davis, Michael E. Douglas.

522 **Writing – original draft:** Michael E. Douglas.

**Writing – review & editing:** Marlis R. Douglas, Whitney J. B. Anthonysamy, Mark A. Davis,

524 Robert L. Schooley, Wade Louis, Matthew P. Mulligan, Michael E. Douglas.

## 526 **References**

- 528 [1] Andrewartha HG, Birch LC. *The Distribution and Abundance of Animals*. University of Chicago Press, Illinois. 1954
- 530 [2] Chen I, Hill JK, Ohlemueller R, Roy DB, Thomas CD. Rapid range shifts of species associated with high levels of climate warming. *Science*. 2011; 333: 1024–1026. <https://doi.org/10.1126/science.1206432>
- 532 [3] Crooks KR, Sanjayan M (eds). *Connectivity Conservation*. Cambridge University Press, Cambridge UK. 2006
- 534 [4] Corlett RT. The anthropocene concept in ecology and conservation. *Trends Ecol Evol*. 2015; 30: 36-41. <https://doi.org/10.1016/j.tree.2014.10.007>
- 536 [5] Henwood WD. Toward a strategy for the conservation and protection of the world's temperate grasslands. *Great Plains Res*. 2010; 20: 121–134.
- 538 <https://www.iucn.org/content/towards-conservation-strategy-worlds-temperate-grasslands>
- 540 [6] Wright CK, Wimberly MC. Recent land use change in the western corn belt threatens grasslands and wetlands. *Proc Natl Acad Sci USA*. 2013; 110: 4134–4139. <https://doi.org/10.1073/pnas.1215404110>
- 542 [7] Pryor SC, Scavia D, Downer C, Gaden M, Iverson L, Nordstrom R, et al. Ch. 18: Midwest. *Climate Change Impacts in the United States*. In: Melillo JM, Richmond TC, Yohe GW, editors. *Climate Change Impacts in the United States: The Third National Climate Assessment*. U.S. Washington DC: Global Change Research Program; 2014. pp. 418–440.
- 544 Also <http://nca2014.globalchange.gov/report/regions/midwest>
- 546
- 548 [8] Tschardt T, Klein AM, Kreuss A, Steffan-Dewenter I, Thies C. Landscape perspectives on agricultural intensification and biodiversity–ecosystem service management. *Ecol Lett*. 2005; 8: 857–874. <https://doi.org/10.1111/j.1461-0248.2005.00782.x>
- 550 [9] Hibbard K, Wilson T, Avery K, Harriss R, Newmark R, Rose, et al. Ch. 10: Energy, water, and land use. In: Melillo JM, Richmond TC, Yohe GW, editors. *Climate Change Impacts in the United States: The Third National Climate Assessment*. Washington DC: U.S. Global Change Research Program; 2014. pp. 257–285.
- 552 <http://nca2014.globalchange.gov/report/sectors/energy-water-and-land>
- 554

- 556 [10] Gelfand I, Sahajpal R, Zhang X, Izaurrealde RC, Gross KL, Robertson GP. Sustainable  
bioenergy production from marginal lands in the US Midwest. *Nature*. 2013; 493: 514–520.  
<https://doi.org/10.1038/nature11811>
- 558 [11] Olden JD, Douglas ME, Douglas MR. The human dimensions of biotic homogenization.  
*Conserv Biol*. 2005; 19: 2036–2038. <https://doi.org/10.1111/j.1523-1739.2005.00288.x>
- 560 [12] Allendorf FW, England PR, Luikart G, Ritchie PA, Ryman N. Genetic effects of harvest on  
wild animal populations. *Trends Ecol Evol*. 2008, 23: 327–337.  
562 <https://doi.org/10.1016/j.tree.2008.02.008>. PMID: 18439706
- [13] Batzli GO. Habitat fragmentation, vole population fluctuations, and the ROMPA  
564 hypothesis: An experimental test using model landscapes. *Integr Zool*. 2016; 11: 469–482.  
<https://doi.org/10.1111/1749-4877.12209>
- 566 [14] Diffendorfer JE, Gaines MS, Holt RD. Habitat fragmentation and movements of three small  
mammals (*Sigmodon*, *Microtus*, and *Peromyscus*). *Ecology*. 1995; 76: 827–839.  
568 <https://doi.org/10.2307/1939348>
- [15] Smith JE, Batzli GO. Dispersal and mortality of prairie vole (*Microtus ochrogaster*) in  
570 fragmented landscapes: A field experiment. *Oikos*. 2006; 112: 209–217.  
<https://doi.org/10.1111/j.0030-1299.2006.13431.x>
- 572 [16] Keane B, Ross S, Crist TO, Solomon NG. Fine-scale spatial patterns of genetic relatedness  
among resident adult prairie vole. *J Mammal*. 2015; 96: 1194–1202.  
574 <https://doi.org/10.1093/jmammal/gyv128>
- [17] Amaral KE, Palace KEM, O'Brien KM, Fenderson LE, Kovach AI. Anthropogenic habitats  
576 facilitate dispersal of an early successional obligate: Implications for restoration of an  
endangered ecosystem. *Plos ONE*. 2016; 11(3): e0148842.  
578 <https://doi.org/10.1371/journal.pone.0148842>
- [18] Anderson SJ, Kierepka EM, Shiwart, RK, Latch OE, Rhodes Jr OE. Assessing the  
580 permeability of landscape features to animal movement: Using genetic structure to infer  
functional connectivity. *Plos ONE*. 2015; 10(2): e0117500.  
582 <https://doi.org/10.1371/journal.pone.0117500>
- [19] Mulligan MP, Shooley RL, Ward MP. Effects of connectivity and regional dynamics on  
584 restoration of small mammal communities in midwestern grasslands. *Restor Ecol*. 2013; 21:  
678–685. <https://doi.org/10.1111/rec.12039>

- 586 [20] Van Oosterhout C, Huthinson WF, Wills DMP, Shipley P. MICRO-CHECKER: Software for  
identifying and correcting genotyping errors in microsatellite data. *Mol Ecol Notes*. 2004; 4:  
588 535–538. <https://doi.org/10.1111/j.1471-8286.2004.00684.x>
- [21] Rousset F. GENEPOP' 007: A complete re-implementation of the GENEPOP software for  
590 windows and linux. *Mol Ecol Resour*. 2008; 8: 103–106. <https://doi.org/10.1111/j.1471-8286.2007.01931.x>
- 592 [22] Rice W. Analyzing tables of statistical tests. *Evolution*. 1989; 43: 223–225.  
<https://doi.org/10.2307/2409177>
- 594 [23] Peakall R, Smouse PE. GENALEX 6.5: Genetic analysis in Excel. Population genetic  
software for teaching and research-an update. *Bioinformatics*. 2012; 28: 2537–2539.  
596 <https://doi.org/10.1093/bioinformatics/bts460>
- [24] Pritchard JK, Stephens M, Donnelly P. Inference of population structure using multilocus  
598 genotype data. *Genetics*. 2000; 155: 945–959. PMC1461096
- [25] Falush D, Stephens M, Pritchard J. Inference of population structure using multilocus  
600 genotype data: Linked loci and correlated allele frequencies. *Genetics*. 2003; 164: 1567–  
1587 PMC1462648
- 602 [26] Henterly AC, Mabry KE, Solomon NG, Chesh AS, Keane B. Comparison of morphological  
versus molecular characters for discriminating between sympatric meadow and prairie voles.  
604 *Am Midl Nat*. 2011; 165: 412–420. <https://doi.org/10.1674/0003-0031-165.2.412>
- [27] Hammock E, Lim M, Nair H, Young L. Association of vasopressin 1a receptor levels with a  
606 regulatory microsatellite and behavior. *Genes Brain Behav*. 2005; 4: 289–301.  
<https://doi.org/10.1111/j.1601-183X.2005.00119.x>
- 608 [28] Ophir AG, Campbell P, Hanna K, Phelps SM. Field tests of cis-regulatory variation at the  
prairie vole *avpr1a* locus: Association with V1aR abundance but not sexual or social  
610 fidelity. *Horm Behav*. 2008; 54: 694–702. <https://doi.org/10.1016/j.yhbeh.2008.07.009>
- [29] Solomon NG, Richmond AR, Harding PA, Fries A, Jacquemin S, Shaefer RL et al.  
612 Polymorphism at the *avpr1a* locus in male prairie voles correlated with genetic but not  
social monogamy in field populations. *Mol Ecol*. 2009; 18: 4680–4695.  
614 <https://doi.org/10.1111/j.1365-294X.2009.04361.x>

- 616 [30] Kalinowski ST. HP-RARE 1.0: A computer program for performing rarefaction on measures  
of allelic richness. *Mol Ecol Notes*. 2005; 5: 187–189. <https://doi.org/10.1111/j.1471-8286.2004.00845.x>
- 618 [31] Earl DA, vonHoldt BM. STRUCTURE HARVESTER: a website and program for visualizing  
620 Structure output and implementing the Evanno method. *Conserv Genet Resour*. 2012; 4:  
359–361. <https://doi.org/10.1007/s12686-011-9548-7>
- 622 [32] Evanno G, Regnaut S, Goudet J. Detecting the number of clusters of individuals using the  
software Structure: A simulation study. *Mol Ecol*. 2005; 14: 2611–2620.  
<https://doi.org/10.1111/j.1365-294X.2005.02553.x>
- 624 [33] Gauffre B, Berthier K, Inchausti P, Chaval Y, Bretagnolle V, Cosson JF. Short-term  
626 variations in gene flow related to cyclic density fluctuations in the common vole. *Mol Ecol*.  
2014; 23: 3214–3225. <https://doi.org/10.1111/mec.12818>
- [34] Piry S, Alapetite A, Cornuet J-M, Baudoin L, Estoup A () GENECLASS2: A software for  
628 [genetic assignment and first-generation migrant detection. *J. Hered*. 2004; 95: 536–539.  
<https://doi.org/10.1093/jhered/esh074>
- 630 [35] Paetkau D, Slade R, Burden M, Estoup A. Genetic assignment methods for the direct, real-  
time estimation of migration rate: A simulation-based exploration of accuracy power. *Mol*  
632 *Ecol*. 2004; 13: 55–65. <https://doi.org/10.1046/j.1365-294X.2004.02008.x>
- [36] Waples RS, Do C. LDNE: A program for estimating effective population size from data on  
634 linkage disequilibrium. *Mol Ecol Resour*. 2008; 8: 753–756. <https://doi.org/10.1111/j.1755-0998.2007.02061.x>
- 636 [37] Slatkin, M. Linkage disequilibrium —Understanding the evolutionary past and mapping the  
medical future. *Nat Rev Genet*. 2008; 9: 477. <https://doi.org/10.1038/nrg2361>
- 638 [38] R Core Team. R: A language and environment for statistical computing. R Foundation for  
Statistical Computing, Vienna, Austria. 2008
- 640 [39] Lin YK, Batzli GO. The influence of habitat quality on dispersal demography, and  
population dynamics of voles. *Ecol Monogr*. 2001; 71: 245–275.  
642 [https://doi.org/10.1890/0012-9615\(2001\)071\[0245:TIOHQO\]2.0.CO;2](https://doi.org/10.1890/0012-9615(2001)071[0245:TIOHQO]2.0.CO;2)
- [40] Oliver TH, Marshall HH, Morecroft MD, Brereton T, Prudhomme C, Huntingford C.  
644 Interacting effects of climate change and habitat fragmentation on drought-sensitive



- butterflies. *Nature Clim Change*. 2015; 5: 941–944.  
646 <https://doi.org/10.1038/NCLIMATE2746>
- [41] Heroldová M, Bryja J, Zejda J, Tkadlec E. Structure and diversity of small mammal  
648 communities in agriculture landscape. *Agr Ecosyst Environ*. 2007; 120: 206–210.  
<https://doi.org/10.1016/j.agee.2006.09.007>
- 650 [42] Marchi C, Andersen LW, Damgaard C, Olsen K, Jensen TS, Loeschcke V. Gene flow and  
652 population structure of a common agricultural wild species (*Microtus agrestis*) under  
different land management regimes. *Heredity*. 2013; 111: 486–494.  
<https://doi.org/10.1038/hdy.2013.70>
- 654 [43] Gauffre B, Estoup A, Bretagnolle V, Cosson JF. Spatial genetic structure of a small rodent  
in a heterogeneous landscape. *Mol Ecol*. 2008; 17: 4619–4629.  
656 <https://doi.org/10.1111/j.1365-294X.2008.03950.x>
- [44] Gilbert L. Can restoration of afforested peatland regulate pests and disease? *J Appl Ecol*.  
658 2013; 50: 1226–1233. <https://doi.org/10.1111/1365-2664.12141>
- [45] Runge JP, Hines JE, Nichols JD. Estimating species-specific survival and movement when  
660 species identification is uncertain. *Ecology*. 2007; 88: 282–288.  
[https://doi.org/10.1890/0012-9658\(2007\)88\[282:ESSAMW\]2.0.CO;2](https://doi.org/10.1890/0012-9658(2007)88[282:ESSAMW]2.0.CO;2)
- 662 [46] Hoffmeister DF. *Mammals of Illinois*. University of Illinois Press, Champaign. 2002
- [47] Moran S, Turner PD, O'Reilly C. Non-invasive genetic identification of small mammal  
664 species using real-time polymerase chain reaction. *Mol Ecol Resour*. 2008; 8: 1267–1269.  
<https://doi.org/10.1111/j.1755-0998.2008.02324.x>
- 666 [48] Douglas MR, Anthonysamy WJB, Mussmann SM, Davis MA, Louis W, Douglas ME.  
Multi-targeted management of upland game birds at the agroecosystem interface of  
668 Midwestern North America. *PLoS ONE Biodiversity*. 2020; 15(4): e0230735.  
<https://doi.org/10.1371/journal.pone.0230735>
- 670 [49] Getz L., Cole FR, Gates D. Interstate roadsides as dispersal routes for *Microtus*  
*pennsylvanicus*. *J Mammal*. 1978; 59: 208–212. <https://doi.org/10.2307/1379900>
- 672 [50] Getz LL, Hoffman JE, McGuire B, Dolan III TW. Twenty-five years of population  
fluctuations of *Microtus ochrogaster* and *M. pennsylvanicus* in three habitats in east-central

- 674 Illinois. J Mammal. 2001; 82: 22–34. [https://doi.org/10.1644/1545-1542\(2001\)082<0022:TFYOPF>2.0.CO;2](https://doi.org/10.1644/1545-1542(2001)082<0022:TFYOPF>2.0.CO;2)
- 676 [51] Klatt BJ, Getz LL, McGuire B. Interspecific interactions and habitat use by prairie vole  
678 (*Microtus ochrogaster*) and meadow vole (*M. pennsylvanicus*). Am Midl Nat. 2015; 173:  
241–252. <https://doi.org/10.1674/amid-173-02-241-252.1>
- [52] Mérő TO, Bocz R, Polyák, L. Horváth G, Lengyel S. Local habitat management and  
680 landscape-scale restoration influence small-mammal communities in grasslands. Anim  
Conserv. 2015; 18: 442–450. <https://doi.org/10.1111/acv.12191>
- 682 [53] Lin YK, Keane B, Isenhour A, Solomon NG. Effects of patch quality on dispersal and social  
684 organization of Prairie Voles: an experimental approach. J Mammal. 2006; 87:446–453.  
<https://doi.org/10.1644/05-MAMM-A-201R1.1>
- [54] Lin YK, Batzli GO. Movement of voles across habitat boundaries: Effects of food and  
686 cover. J Mammal. 2004; 85: 216–224. [https://doi.org/10.1644/1545-1542\(2004\)085<0216:MOVAHB>2.0.CO;2](https://doi.org/10.1644/1545-1542(2004)085<0216:MOVAHB>2.0.CO;2)
- 688 [55] Pilot M, Dabrowski M, Jancewicz E, Schtickzelle N, Gliwicz J. Temporally stable genetic  
690 variability and dynamic kinship structure in a fluctuating population of the root vole  
*Microtus oeconomus*. Mol Ecol. 2010; 19: 2800–2812. <https://doi.org/10.1111/j.1365-294X.2010.04692.x>
- 692 [56] Chiappero MB, Sommaro LV, Priotto JW, Wiernes MP, Steinmann AR, Gardenal CN.  
694 Spatio-temporal genetic structure of the rodent *Calomys venustus* in linear, fragmented  
habitats. J Mammal. 2016; 97: 424–435. <https://doi.org/10.1093/jmammal/gyv186>
- [57] Myers JH. Population cycles: Generalities, exceptions and remaining mysteries. Proc R Soc  
696 B. 2018; 285: 20172841. <http://dx.doi.org/10.1098/rspb.2017.2841>
- [58] Melis C, Borg AA, Jensen H, Bjorkvoll E, Ringsby TH, Saether TH. Genetic variability and  
698 structure of the water vole *Arvicola amphibius* across four metapopulations in northern  
Norway. Ecol Evol. 2013; 3: 770–778. <https://doi.org/10.1002/ece3.499>
- 700 [59] Getz LL, McGuire B, Pizzuto T, Hofmann JE, Frazee B. Social-organization of the prairie  
vole (*Microtus ochrogaster*). J Mammal. 1993; 74: 44–58. <https://doi.org/10.2307/1381904>

- 702 [60] Lee NS, Goodwin NL, Freitas KE, Beery AK. Affiliation, aggression, and selectivity of peer  
relationships in Meadow and Prairie Voles. *Front Behav Neurosci.* 2019; 13: 52.  
704 <https://doi.org/10.3389/fnbeh.2019.00052>
- [61] Correa Ayram, CA, Mendoza ME, Etter A, Salicrup DRP. Habitat connectivity in  
706 biodiversity conservation: A review of recent studies and applications. *Prog Phys Geogr.*  
2015; 40: 7–37. <https://doi.org/10.1177/0309133315598713>
- 708 [62] Tracey JA, Bevins SN, Vanderwoude S, Crooks KR. An agent-based movement model to  
assess the impact of landscape fragmentation on disease transmission. *Ecosphere.* 2014; 5:  
710 119. <https://doi.org/10.1890/ES13-00376.1>
- [63] Biek B, Real LA. The landscape genetics of infectious disease emergence and spread. *Mol*  
712 *Ecol.* 2010; 19: 3515–3531. <https://doi.org/10.1111/j.1365-294X.2010.04679.x>
- [64] Blanchong JA, Robinson SJ, Samuel MD, Foster JT. Application of genetics and genomics  
714 to wildlife epidemiology. *J Wildl Manage.* 2016; 80: 593–608.  
<https://doi.org/10.1002/jwmg.1064>
- 716 [65] Kelly AC, Mateus-Pinilla NE, Brown W, Ruiz MO, Douglas MR, Douglas ME et al.  
Genetic assessment of environmental features that influence deer dispersal: Implications for  
718 prion-infected populations. *Pop Ecol.* 2014; 56: 327–340. <https://doi.org/10.1007/s10144-013-0427-9>
- 720 [66] Rubio AV, Avila-Flores R, Suzán G. Responses of small mammals to habitat fragmentation:  
Epidemiological considerations for rodent-borne hantaviruses in the Americas. *Ecohealth.*  
722 2014; 11: 526–533. <https://doi.org/10.1007/s10393-014-0944-9>
- [67] Voordouw MJ, Lachish S, Dolan MC. The Lyme disease pathogen has no effect on the  
724 survival of its rodent reservoir host. *PLoS ONE.* 2015; 10: e0118265.  
<https://doi.org/10.1371/journal.pone.0118265>
- 726 [68] Leighton PA, Koffi JK, Pelcat Y, Lindsay LR, Ogden NH. Predicting the speed of tick  
invasion: An empirical model of range expansion for the Lyme disease vector *Ixodes*  
728 *scapularis* in Canada. *J Appl Ecol.* 2012; 49: 457–464. <https://doi.org/10.1111/j.1365-2664.2012.02112.x>
- 730 [69] LoGuidice K, Ostfeld RS, Schmidt KA, Keesiing F. The ecology of infectious disease:  
Effects of host diversity and community composition on Lyme disease risk. *Proc Natl Acad*  
732 *Sci USA.* 2003; 100: 567–571. <https://doi.org/10.1073/pnas.0233733100>

- 734 [70] Rydzewski JR, Mateus-Pinilla N, Warner RE, Hamer S, Weng H. *Ixodes scapularis* and  
*Borrelia burgdorferi* among diverse habitats within a natural area in east-central illinois.  
Vector-Borne Zoonot. 2011; 11: 1351–1358. <https://doi.org/1089/vbz.2010.0160>
- 736 [71] Gottdenker NL, Streicker DS, Faust CL, Carroll CR. Anthropogenic land use change and  
infectious diseases: A review of the evidence. Ecohealth. 2014; 11: 619–632.  
738 <https://doi.org/10.1007/s10393-014-0941-z>
- 740 [72] Leo SST, Gonzalez A, Millien V. Multi-taxa integrated landscape genetics for zoonotic  
infectious diseases: Deciphering variables influencing disease emergence. Genome. 2016;  
59: 349–361. <https://doi.org/10.1139/gen-2016-0039>
- 742 [73] Morlando S, Schmidt SJ, Loguidice K. Reduction in Lyme disease risk as an economic  
benefit of habitat restoration. Restor Ecol. 2012; 20: 498–504.  
744 <https://doi.org/10.1111/j.1526-100X.2011.00796.x>

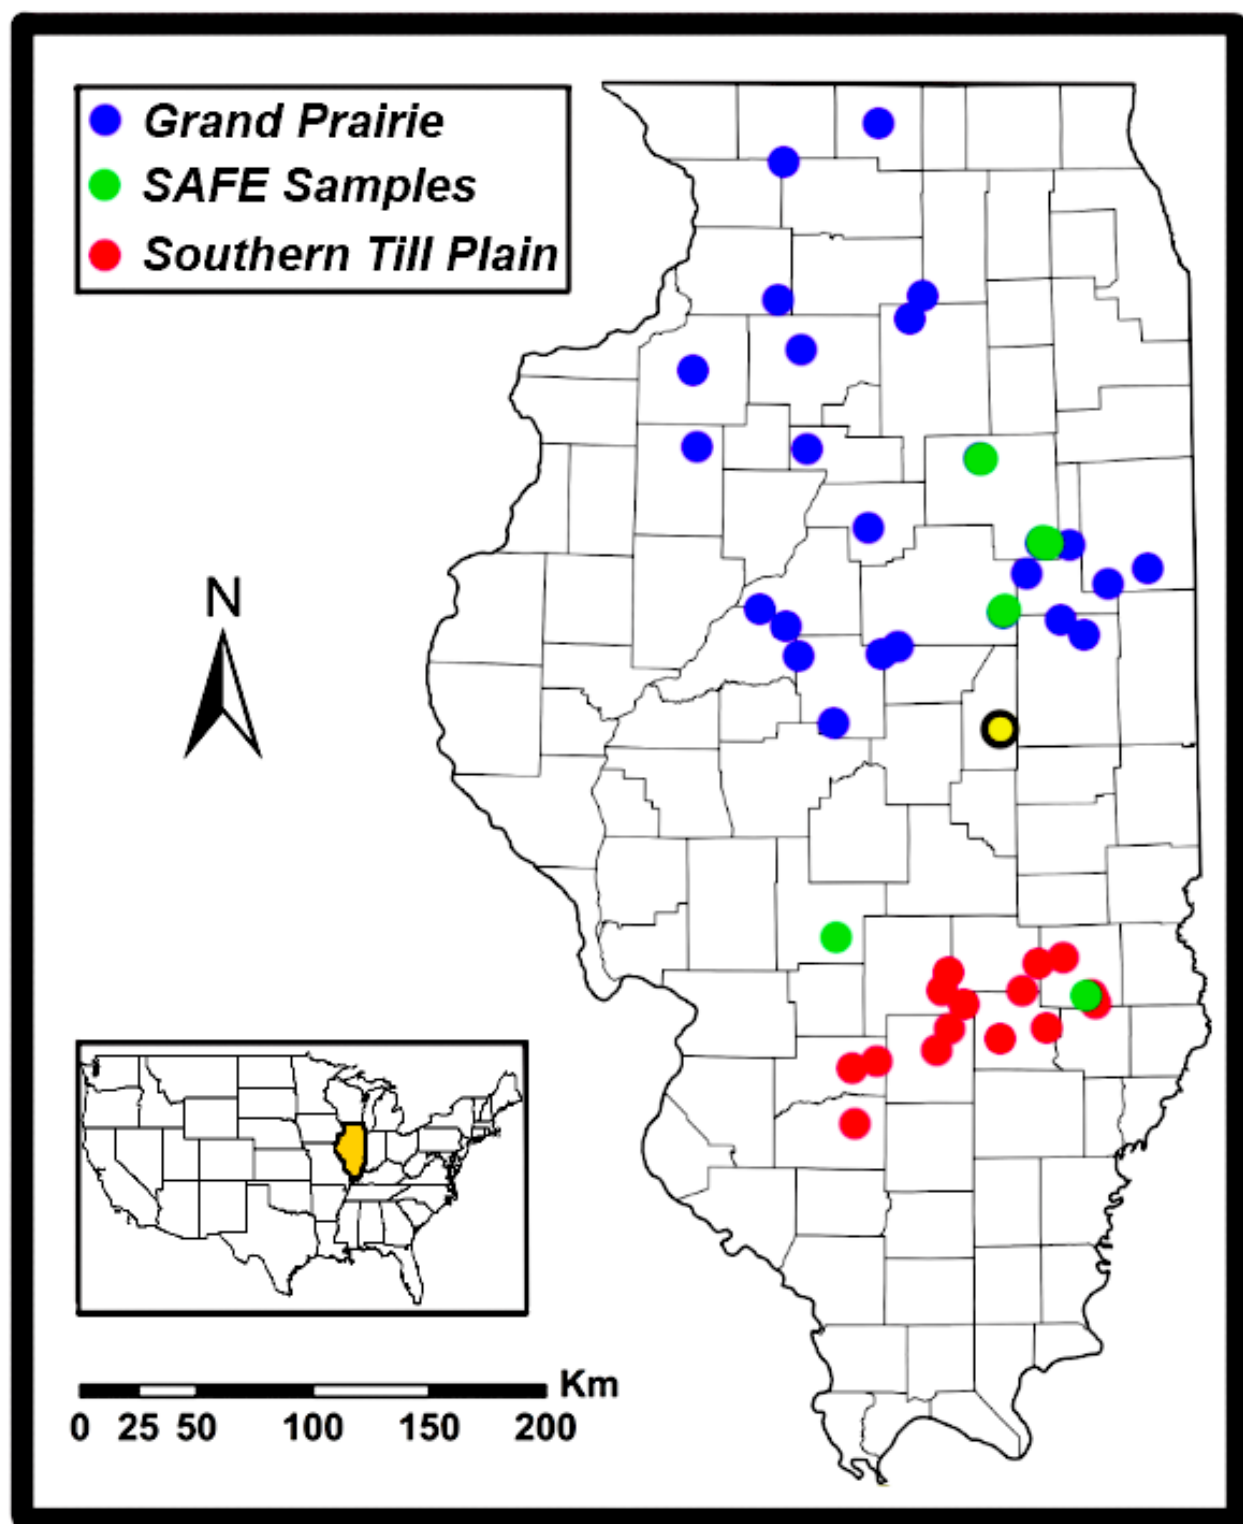

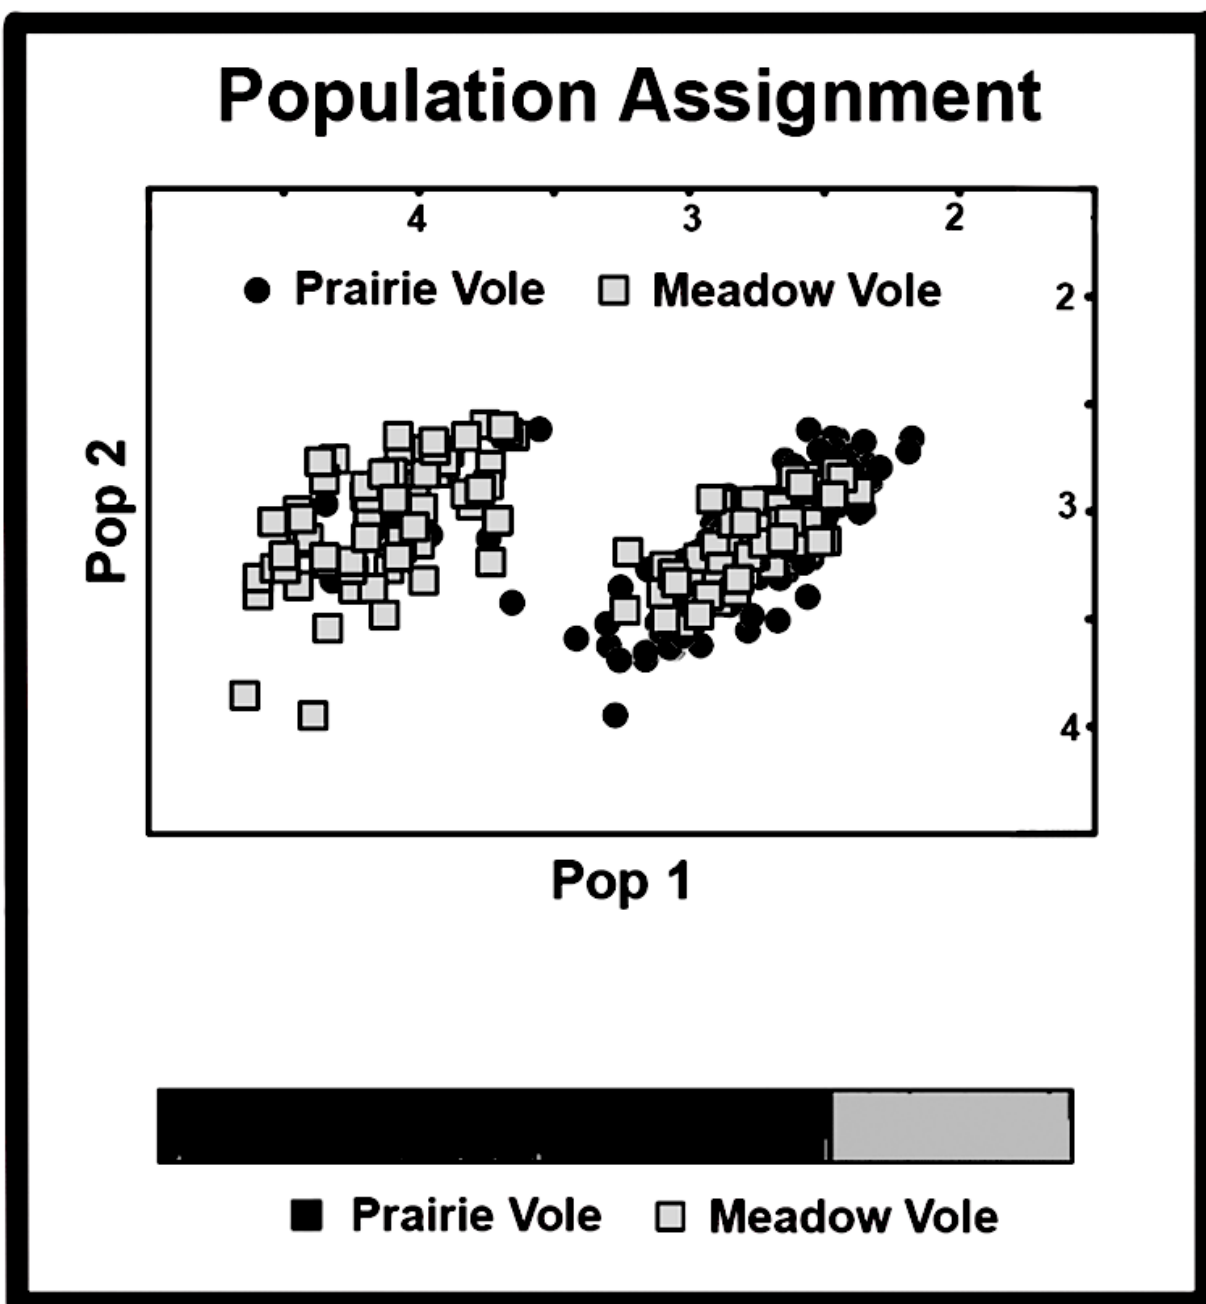

### Bayesian assignment tests for Prairie Vole (*Microtus ochrogaster*)

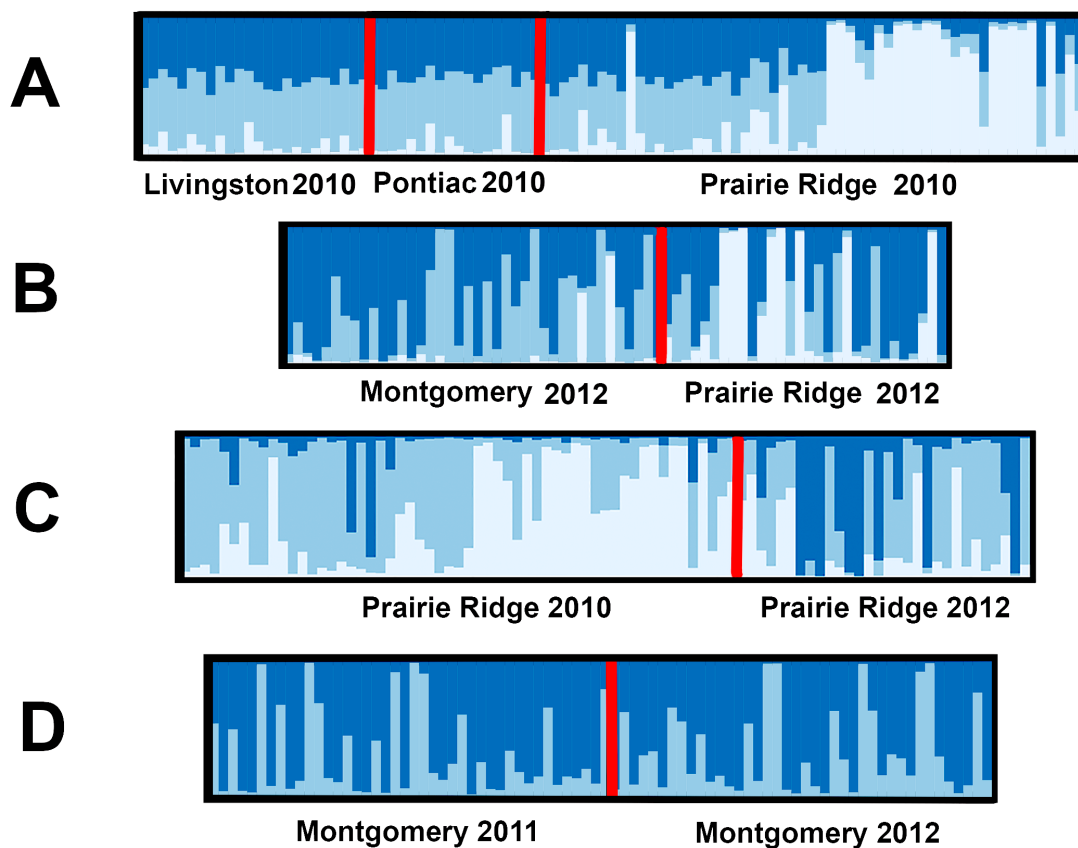

## Supplemental Appendix I: Multiplex Panels

The 23 microsatellite DNA primers that successfully amplified loci in Prairie and Meadow Vole were combined into six multiplex panels for data generation. Included for each panel are: original primer name, repeat motif, citation, and forward and reverse primer sequences. Amplifications were conducted in 10-15  $\mu$ l volume polymerase chain reactions (PCR) using 1X *Flexi*-buffer (PROMEGA), 2.5-3.5 mM MgCl<sub>2</sub>, 0.25 mM dNTPs, 0.2  $\mu$ g BSA, 1 unit *Go*-taq polymerase (PROMEGA), 0.1  $\mu$ M of each forward and reverse primer, and approximately 10-15 ng template DNA. Reactions were carried out under the following conditions: initial denaturation at 94°C for 3 min, followed by 15 cycles of 94°C for 45 s, 55°C annealing temperature for 45 s, and a 72°C extension for 30 s, followed by an additional 25 cycles of 95°C for 30 s, 55°C annealing temperature for 30 s, and a 72°C extension for 15 s, followed by a final extension at 72°C for 3 min.

| Multiplex | Primer Name | ABI Dye | Motif                                 | Citation               | Forward Primer          | Reverse Primer          |
|-----------|-------------|---------|---------------------------------------|------------------------|-------------------------|-------------------------|
| 1         | AV14        | 6-FAM   | (GATA) <sub>16</sub>                  | Stewart et al. 1998    | TATGTGATATGGCACTAGCATGT | AGCCTGTCTCAGCAGAAGG     |
|           | Ma35        | VIC     | (GT) <sub>18</sub>                    | Gauffre et al. 2007    | AGAGTATGGCTGAGGGTG      | GCCAGAGCAGTGTGATG       |
|           | AV15        | NED     | (GATA) <sub>14</sub>                  | Stewart et al. 1998    | TATATGGAAGGTCGTAGATTCAG | ATTAAAGCATTTGTTGAGAAAGC |
|           | AV13        | PET     | (GATA) <sub>14</sub>                  | Stewart et al. 1998    | CTGGCTCTATCTATCTGTCTATC | ACAATTACAGCATCCAGAAG    |
|           | AT23        | 6-FAM   | (TG) <sub>20</sub>                    | Berthier et al. 2004   | GGATCATCTTCGCTAAGGAG    | CCATCTCAGGCCTAATTCAG    |
| 2         | MSMM-3      | VIC     | (CA) <sub>15</sub>                    | Ishibashi et al. 1999  | TACGCCCCCTCAAACCTCATGTG | TCCTTTATCTTAGGTGATGGAG  |
|           | MSMM-2      | NED     | (CA) <sub>21</sub> (GA) <sub>22</sub> | Ishibashi et al. 1999  | TAACCACAACCCCTCAAACCTG  | TCATTTGGAGTTGCTGAGAAC   |
|           | MSMM-6      | PET     | (CA) <sub>18</sub>                    | Ishibashi et al. 1999  | TACAAATCTATCCTCTGACCTC  | TACAAAGCCATTGTTCCCTGCT  |
| 3         | Mar076      | VIC     | (AC) <sub>16</sub>                    | Walser and Heckel 2008 | TCACCAGGACCTACTGAGCA    | GCCAGCTTCATTTCAAGAGG    |
|           | Cg17A7      | NED     | (ATGT) <sub>9</sub>                   | Rikalainen et al. 2008 | ACATTCAAACCTATGGGACA    | GAAGGCTATTGATCTTGAC     |
|           | Ma66        | PET     | (TG) <sub>24</sub>                    | Gauffre et al. 2007    | AAGGTCTGGTGGATGTCAGG    | TGCAAGGCAGGATTCTACC     |
|           | LIST3-005   | PET     | (GT) <sub>21</sub>                    | Barker et al. 2005     | ATGAGGCTTCTTTCTATGTCC   | CCTGCTCTGTATGCTTTGA     |



|   |        |       |                    |                        |                        |                            |
|---|--------|-------|--------------------|------------------------|------------------------|----------------------------|
|   | Mar113 | 6-FAM | (AC) <sub>12</sub> | Walser and Heckel 2008 | AAGAGCCTGCTGTGGTTTGT   | TCAGCTGGGAATCAGGTCTT       |
| 4 | Mar003 | VIC   | (TG) <sub>21</sub> | Walser and Heckel 2008 | GGAGATACAAGGCCCAAACA   | TGGCATTAGATGACCTGTGG       |
|   | Ma-09  | NED   | (AC) <sub>18</sub> | Gauffre et al. 2007    | CCCTAAGGAATAGCATCTGAG  | GAATGTATGTGGAAGCCAGG       |
|   | Mar016 | PET   | (CA) <sub>19</sub> | Walser and Heckel 2008 | CATCATCTTCTGGGGCACTG   | ACGGTCTGTGCAAACCACTT       |
|   | MAG25  | 6-FAM | (CA) <sub>17</sub> | Jaarola et al. 2007    | TGGGATAGCCTAGCAGCAAGA  | GTTTGTAGGGTTAGGTTCTCAGTTG  |
| 5 | AT2    | VIC   | (TC) <sub>20</sub> | Berthier et al. 2004   | CAAAGAGGAAGTGCTAGGTTGG | ACCCTTGGGACTCTGTTTGC       |
|   | Mar063 | PET   | (AC) <sub>23</sub> | Walser and Heckel 2008 | GCCTGGACACAACCAAACCTT  | GGCTATGGGCAGCTCCTG         |
|   | MSMM-5 | 6-FAM | (CA) <sub>17</sub> | Ishibashi et al. 1999  | TCTAATACCCTCTTCCTTGGG  | TCCTATCAAGGGGCATTCATCT     |
|   | MAG18  | VIC   | (AC) <sub>22</sub> | Jaarola et al. 2007    | GTATGCCTGCTATTGTGAAGAC | GTTTGCTCTTTTGTCCAGTAACTCAC |
| 6 | MAG26  | NED   | (AG) <sub>31</sub> | Jaarola et al. 2007    | CCTCTCAAAGCAGTTAAGC    | GTTTAGCGTTACTATTGTAGCC     |
|   | MSMM-4 | PET   | (CA) <sub>19</sub> | Ishibashi et al. 1999  | TGTTTCAAGGCAATAAGGTGG  | TCGTTTCCCTGGAGATTGGG       |

---

760

762 **References Cited:**

Barker FS, Helyar J, SJ Kemp, Begon M. Highly polymorphic microsatellite loci in the bank vole (*Clethrionomys glareolus*).  
 764 Mol. Ecol. Notes 2005; 5: 311–313. doi:/10.1111/j.1471-8286.2005.00911.x

Berthier K, Galan M, Weber A, Loiseau A, Cosson JF. A multiplex panel of dinucleotide microsatellite markers for the water  
 766 vole, *Arvicola terrestris*. Mol. Ecol. Notes 2004; 7: 620–622. doi:/10.1111/j.1471-8286.2004.00756.x

Gauffre B, Galan M, Bretagnolle V, Cosson JF. Polymorphic microsatellite loci and PCR multiplexing in the common vole,  
 768 *Microtus arvalis*. Mol. Ecol. Notes 2007; 7: 830–832. doi:/10.1111/j.1471-8286.2007.01718.x

- 770 Ishibashi Y, Yoshinaga Y, Saitoh T, Abe S, Iida H, Yoshida MC. Polymorphic microsatellite DNA markers in the field vole *Microtus montebelli*. Mol. Ecol. 1999; 8: 163–164. PMID: 9919707
- 772 Jaarola M, Ratkiewicz M, Ashford RT, Brunhoff C, Borkowksa A. Isolation and characterization of polymorphic microsatellite loci in the field vole, *Microtus agrestis*, and their cross-utility in the common vole, *Microtus arvalis*. Mol. Ecol. Notes. 2007; 7:  
774 1029–1031. doi:/10.1111/j.1471-8286.2007.01763.x
- Rikalainen K, Grapputo A, Knott E, Koskela E, Mappes T. A large panel of novel microsatellite markers for the bank vole  
776 (*Myodes glareolus*). Mol. Ecol. Res. 2008; 8: 1164–1168. doi:/10.1111/j.1755-0998.2008.02228.x
- Stewart WA, Piertney WA, Dallas DF. Isolation and characterization of highly polymorphic microsatellites in the water vole,  
778 *Arvicola terrestris*. Mol. Ecol. 1998; 7: 1247–1263. PMID: 9734085
- Walser B, Heckel G. Microsatellite markers for the common vole (*Microtus arvalis*) and their cross-species utility. Cons. Gen.  
780 2008; 9: 479–481. doi:/10.1007/s10592-007-9355-6
